# Supplementary material
Source: MDPI journal article supplement (https://www.mdpi.com/2072-4292/15/7/1866)
Supplement: s1 [file s1]

# Table of Contents

|                                                  |                                     |
|--------------------------------------------------|-------------------------------------|
| Methods .....                                    | 2                                   |
| S1 Ecosystem services (ESs) assessment .....     | 2                                   |
| S1.1 Equivalent Value Factors (EVF) method ..... | 2                                   |
| S1.2 Water yield (WY) .....                      | 2                                   |
| S1.3 Carbon storage (Ca.).....                   | 3                                   |
| S1.4 Soil conservation (SC) .....                | 4                                   |
| S2 Social-ecological drivers of ESs .....        | 5                                   |
| S2.1 Landscape disturbance .....                 | 5                                   |
| S2.2 Shoreline use intensity .....               | 6                                   |
| S2.3 Salinization .....                          | 6                                   |
| S2.4 Runoff.....                                 | 7                                   |
| S2.5 Index of Connectivity.....                  | 7                                   |
| References.....                                  | <b>Error! Bookmark not defined.</b> |

## Methods

### S1 Ecosystem Services (ESs) Assessment

#### S1.1 Equivalent Value Factors (EVF) Method

Although land use/land cover (LULC) and ecosystem types do not correspond to each other, according to previous studies [1] and the specific situation of the Yellow River Delta (YRD), each LULC was associated with the closest ecosystem type, so rivers, lakes, ponds, and reservoirs corresponded to water bodies. Mudflats and reed swamps corresponded to wetlands. The barren was close to desert due to the sparse surface vegetation, so the equivalent factor of desert was used.

The surface of the construction land was relatively dense and the vegetation was relatively sparse, and its functions of food production (FP), raw material (RM), waste treatment (WT), habitat quality (HQ), water yield (WY), and soil conservation (SC) were all zero, while gas regulation (GR) and climate regulation (CR) referred to the desert, and its relaxation (Re.) referred to the recreational functions of the forest [2]. In this paper, according to the corrected grain price and the equivalent value factors of ESs applicable to China [3] (Table S1), we compiled the ES value factor equivalents per unit area for each LULC in the YRD, which were used to estimate the value of Re., WT, FP, CR, GR, and RW.

**Table S1.** Equivalent value factors of ecosystem services per unit area in China [3].

| Ecosystem Service  | Forest | Grasslands | Croplands | Wetlands | Water Bodies | Barren |
|--------------------|--------|------------|-----------|----------|--------------|--------|
| Climate regulation | 4.07   | 1.56       | 0.97      | 13.55    | 2.06         | 0.13   |
| Waste treatment    | 1.72   | 1.32       | 1.39      | 14.4     | 14.85        | 0.26   |
| Food production    | 0.33   | 0.43       | 1         | 0.36     | 0.53         | 0.02   |
| Raw material       | 2.98   | 0.36       | 0.39      | 0.24     | 0.35         | 0.04   |
| Relaxation         | 2.08   | 0.87       | 0.17      | 4.69     | 4.44         | 0.24   |
| Gas regulation     | 4.32   | 1.5        | 0.72      | 2.41     | 0.51         | 0.06   |
| Water yield        | 4.09   | 1.52       | 0.77      | 13.44    | 18.77        | 0.07   |
| Soil conservation  | 4.02   | 2.24       | 1.47      | 1.99     | 0.41         | 0.17   |
| Habitat quality    | 4.51   | 1.87       | 1.02      | 3.69     | 3.43         | 0.4    |

#### S1.2 Water Yield (WY)

The reference evapotranspiration ( $ET_0$ ) in the InVEST WY model is same as the traditional concept of potential evapotranspiration. Potential evapotranspiration refers to the evapotranspiration under the assumption that the ground is completely covered by specific short-stalked green plants, there is sufficient moisture in the soil, and the soil environment is moist [4]. It can be calculated by many methods, such as the P-M algorithm [5], Hargreaves algorithm [6], and so on. However, these calculation methods require a large amount of data. Based on the data collected in the study area and the applicability of the calculation methods, and after calculation and comparison, a modified Hargreaves method (Equation (S5)) was selected to estimate the potential evapotranspiration in the study area.

$$ET_0 = 0.0013 \times 0.408 \times RA \times (T_{avg} + 17) \times (TD - 0.0123P)^{0.76} \quad (S1)$$

where  $ET_0$  is the potential evapotranspiration (mm/d); and  $RA$  is the solar radiation in the thermosphere (MJ/(m<sup>2</sup>·d)). It is obtained by dividing the average total solar radiation of the weather station by 50%. The total solar radiation data are the average value of the multi-year monitoring data at the Fushan Meteorological Station in Yantai;  $T_{avg}$  is the average of the daily highest and lowest temperatures (°C);  $TD$  is the difference between the average daily highest temperature and the average daily lowest temperature (°C); and  $P$  is the average monthly rainfall. The spatial distribution map of average annual rainfall was obtained by the AunSPLINE interpolation method.

**Table S2.** The root depth and evapotranspiration coefficient of each land use/land cover.

| Land Use/ Land Cover           | Evapotranspiration Coefficient | Root Depth (mm) | Whether Vegetated (1=Yes; 0=No) |
|--------------------------------|--------------------------------|-----------------|---------------------------------|
| Croplands                      | 0.65                           | 300             | 1                               |
| Forest                         | 1.00                           | 3000            | 1                               |
| Grasslands                     | 0.65                           | 2000            | 1                               |
| Water Bodies                   | 1.00                           | 1               | 0                               |
| Wetlands                       | 0.60                           | 1000            | 0                               |
| Urban and rural build-up lands | 0.30                           | 1               | 0                               |
| Barren                         | 0.20                           | 200             | 0                               |

### S1.3 Carbon Storage (Ca.)

Alam et al. indicated that precipitation was significantly and positively correlated with biomass carbon density and soil carbon density (Alam et al., 2013). Therefore, combining the weights of the factors influencing carbon density and the needs of this study, the correction equation was selected as follows.

$$C_{BP} = 6.789 \times e^{0.0054 \times MAP}$$

$$C_{SP} = 3.3968 \times MAP + 3996.1$$

$$K_{BP} = \frac{C_{BP1}}{C_{BP2}} \quad (S2)$$

$$K_{SP} = \frac{C_{SP1}}{C_{SP2}}$$

where  $C_{BP}$  is the biomass density corrected according to the annual precipitation (unit:  $t \cdot hm^{-2}$ );  $C_{SP}$  is the soil carbon density corrected according to the annual precipitation (unit:  $t \cdot hm^{-2}$ );  $MAP$  is the annual average precipitation (mm);  $K_{BP}$  is the correction coefficient of biomass carbon density precipitation factor;  $K_{SP}$  is the correction coefficient of soil carbon density precipitation factor;  $C_{BP1}$ ,  $C_{SP1}$  are the carbon density parameters in the lower reaches of the Yellow River, and  $C_{BP2}$ ,  $C_{SP2}$  are the national carbon density parameters. The carbon density parameters of the study area were obtained by multiplying the national carbon density parameters and the correction coefficient, as shown in Table S3.

**Table S3.** The carbon density of each land use/land cover ( $Mg \cdot ha^{-1}$ ).

| Land Use/Land Cover            | C_above | C_below | C_soil | C_dead |
|--------------------------------|---------|---------|--------|--------|
| Croplands                      | 9.0     | 4.0     | 25.0   | 0.3    |
| Forest                         | 5.0     | 3.0     | 20.0   | 0.0    |
| Grasslands                     | 2.0     | 1.0     | 5.0    | 0.0    |
| Water bodies                   | 1.5     | 0.5     | 16.0   | 0.0    |
| Wetlands                       | 17      | 8.0     | 15.0   | 0.6    |
| Urban and rural build-up lands | 0.0     | 0.0     | 12.0   | 0.0    |
| Barren                         | 0.1     | 0.0     | 0.0    | 0.0    |

#### S1.4 Soil Conservation (SC)

The management factor refers to the factor that reduces the potential soil erosion due to some physical and chemical measures, and is expressed by  $P$ . The value of  $P$  is [0,1], and the  $P$  value is 0 when very good soil and water conservation measures are taken, and 1 when no soil and water conservation measures are taken. According to the above research and related literature in the similar study area [7–11], we determined the selection of the  $P$  value. By looking up Appendix 3 of “the list of counties and cities in China's farming system”, we found the category to which Dongying City belonged. According to the name of the national rotation area in Appendix 5 of “Technical regulations on dynamic monitoring of regional soil and water loss”, we found that the  $P$  value of cropland was 0.391 and other LULCs were set to 1, as shown in Table S4.

**Table S4.** The management factor expressed by  $P$  of different LULCs.

| LULC                           | Management Factor ( $P$ ) |
|--------------------------------|---------------------------|
| Forest                         | 1.000                     |
| Grasslands                     | 1.000                     |
| Croplands                      | 0.391                     |
| Urban and rural build-up lands | 1.000                     |
| Barren                         | 1.000                     |
| Wetlands                       | 1.000                     |
| Water bodies                   | 1.000                     |

#### S1.5.1 Rainfall Erosivity

According to relevant literature, we decided to use the rainfall erosivity mapping over mainland China based on high-density hourly rainfall records published by Yue et al. [12], including annual rainfall erosivity (R-factor) in the Chinese Mainland from 1951 to 2018. Hourly and daily data for more than 2000 stations were collected, together with the 1 min data for 62 of them to develop high-quality maps of the R-factor. They not only provided high spatial–temporal resolution rainfall erosivity over the mainland China, but also greatly improved the accuracy of the existing rainfall erosivity dataset.

The R-factor was calculated using Equations (S3)–(S5) [13]:

$$R = \frac{1}{N} \sum_{i=1}^N \sum_{j=1}^m (EI_{30})_{ij} \quad (S3)$$

$$E = \sum_{r=1}^l (e_r \cdot P_r) \quad (S4)$$

$$e_r = 0.29[1 - 0.72\exp(-0.082i_r)] \quad (S5)$$

where  $EI_{30}$  (event rainfall erosivity, MJ mm ha<sup>-1</sup> h<sup>-1</sup>) is the product of the total storm energy  $E$  (MJ ha<sup>-1</sup>) and the maximum 30 min intensity  $I_{30}$  (mm h<sup>-1</sup>);  $i = 1, 2, \dots, N$ , where  $N$  is the number of effective years, and  $j = 1, 2, \dots, m$  means there are  $m$  erosive storm events in the  $i$ th year. For each storm event, rainfall was divided into  $l$  time intervals depending on the temporal resolution of rainfall data. The total storm energy  $E$  was the sum of the energy for each time interval  $r$ , which was the unit energy  $e_r$  (energy per mm of rainfall, MJ ha<sup>-1</sup> mm<sup>-1</sup>) multiplied by the rainfall amount  $P_r$  (mm) for each time interval. In addition,  $i_r$  was the intensity (mm h<sup>-1</sup>) of the  $r$ th interval, and  $I_{30}$  (mm h<sup>-1</sup>) was the maximum intensity over 30 consecutive minutes for each storm event. For hourly data, the  $I_{30}$  was assumed to be the same as the maximum 1 h intensity.

#### S1.5.2 Soil Erodibility Factor

The soil erodibility factor ( $K$ ) reflects the sensitivities of different soil types to erosion. The soil data were adopted from the Chinese Soil Database (vdb3.soil.csdb.cn). The sand

grains, powder particles, clay particle, and organic carbon were calculated using the EPIC model equations [14] as follows:

$$K = \left\{ 0.2 + 0.3 \exp \left[ -0.0256 \times SAN \left( 1 - \frac{SIL}{100} \right) \right] \right\} \times \left( \frac{SIL}{CLA + SIL} \right)^{0.3} \\ \times \left[ 1 - 0.025 \times \frac{C}{C + \exp(3.72 - 2.95 C)} \right] \\ \times \left( 1 - 0.7 \times \frac{SN_1}{22.9 SN_1 - 5.51} \right) \\ SN_1 = 1 - \frac{SAN}{100} \quad (S6)$$

where  $SAN$ ,  $SIL$  and  $CLA$  are the mass fractions (%) of sand, powder, and clay, respectively; and  $C$  is the mass fraction of organic carbon (%).

### S1.5.3 The Slope and Slope Length

The InVEST Sediment Delivery Ratio (SDR) Model automatically generates the slope and slope length at the backend based on the digital elevation model (DEM). The slope and slope length were calculated using a two-dimensional surface calculation method as follows:

$$L_x \times S_x = S_x \times \frac{(A + D^2)^{m+1} - A^{m+1}}{D^{m+2} \times x_x^m \times 22.13^m} \quad (S7)$$

where  $S_x$  is the slope factor of the grid cell, and it is the function of slope, and  $S_x = 10.8 \cdot \sin(\theta) + 0.03$  if slope  $< 9\%$ , and  $S_x = 16.8 \cdot \sin(\theta) - 0.50$  if  $\geq 9\%$ ;  $A$  is the area of the sand-producing area above the grid runoff inlet ( $m^2$ );  $D$  is the grid cell size ( $m$ );  $x_n = |\sin \alpha_n| + |\cos \alpha_n|$ , where  $\alpha_n$  represents the sediment transport direction of grid cell  $x$ ; and  $m$  is the RUSLE length exponential factor (Equation (S13)).

$$\begin{cases} \theta \leq 1\%, & m = 0.2 \\ 1\% < \theta \leq 3.5\%, & m = 0.3 \\ 3.5\% < \theta \leq 5\%, & m = 0.4 \\ 5\% < \theta \leq 9\%, & m = 0.5 \\ \theta > 9\%, & m = \beta / (1 + \beta) \end{cases} \quad (S8)$$

where  $\beta = \sin \theta / [0.0986 \cdot (3 \sin \theta \cdot 0.8 + 0.56)]$ .

## 2. Social-Ecological Drivers of ESs

### 2.1. Landscape Disturbance

The landscape disturbance index ( $G_i$ ) indicates the ability of the landscape to resist external disturbance and self-recovery. The greater the intensity of human and natural disturbance to the landscape pattern, the greater the sensitivity of the entire ecosystem and the greater the ecological risk of the landscape. The formula was as follows.

$$G_i = W_1 \times PO_i + W_2 \times D_i + W_3 \times F_i \quad (S9)$$

where  $W_1$ ,  $W_2$ , and  $W_3$  are the weights of landscape fragmentation ( $PO_i$ ), landscape separation ( $D_i$ ), and landscape sub-dimensionality ( $F_i$ ), respectively, which are assigned 0.5, 0.3, and 0.2, respectively, based on related research results [15,16]; and  $i$  is the specific LULC type. The above indices were calculated using ArcGIS 10.2 and Fragstats 4.2.

### S2.2 Shoreline Use Intensity

Based on the development and utilization statuses of island coastline, shoreline developments can be classified into different types. The reference values for evaluating the impacts of different shoreline development types on the island ecosystem can be set, usually based on common knowledge of technicians in the field.

The impact of the development of  $N$  shoreline segments on any grid of ecosystem on the island land can be calculated with the equation below [17]:

$$I(x, y) = \frac{1}{N} \sum_{i=1}^N \frac{P_i}{1 + D_i(x, y)/w} \quad (S10)$$

where  $I(x, y)$  represents the impact of the development of  $N$  shoreline segments on any grid of the island ecosystem;  $P_i$  is the reference value for the assessment of the impact of the shoreline type on the island ecosystem;  $D_i(x, y)$  is the attenuation distance from the central point of any grid to the midpoint of the  $i$ th shoreline segment;  $N$  is the number of shoreline segments; and  $w$  is the half attenuation coefficient, which was 0, 0.4, 0.6, 0.8, and 1.0, respectively, [17] for different types of shoreline developments including the undeveloped shoreline, embankment dam, protective dam, industrial and town, and port and dock on the YRD, respectively

We extracted shoreline types using remote sensing images downloaded from the Geospatial Data Cloud (<https://www.gscloud.cn>). Radiation calibration, band blending, and island contour extraction were conducted on the satellite remote sensing images of 1980 (LANDSAT 4), 1990 (LANDSAT 5), 2000 (LANDSAT 5), 2010 (LANDSAT 5), and 2020 (LANDSAT 8).

### S2.3 Salinization

Seawater intrusion is a serious threat to natural ecosystems [18]. Soil salinization is a common ecological problem in coastal wetlands, caused mainly by seawater intrusion, and considerably threatens soil quality, biological community, and agricultural production [19–21].

In this paper, the salinity index (SI) [22] was used as a soil salinity inversion model to extract information on soil salinity in the YRD. According to the relevant research results [23], the correlation coefficient  $R^2$  between the salinity index and the measured total salt content of soil reached more than 0.6, which meets the requirements of soil salinization inversion. Moreover, the calculation is simpler and more convenient for the analysis of spatial and temporal variation of multiphase soil salinity.

$$SI = \sqrt{B \times R} \quad (S11)$$

where  $B$  is the blue wave band of the image and  $R$  is the red wave band. We extracted salinization information using remote sensing images downloaded from the Geospatial Data Cloud (<https://www.gscloud.cn>). Radiation calibration, band blending, and island contour extraction were conducted on the satellite remote sensing images of 1980 (LANDSAT 4), 1990 (LANDSAT 5), 2000 (LANDSAT 5), 2010 (LANDSAT 5), and 2020 (LANDSAT 8).

#### S2.4 Runoff

The Yellow River is the most unique and important external factor affecting the YRD, whose water and sand input is an important driver for the formation and extension of the YRD [24,25]. In addition, the Yellow River, as an important water source, has important ecological functions for vegetation growth and soil quality improvement, which decrease with increasing distance from the river.

The annual runoff from the Lijin hydrological station, which is the last hydrological station where the Yellow River enters the sea, was used to represent the Yellow River input. The average runoff from 1980 to 2020 was considered as the evaluation criterion. The equation was as follows.

$$E_1 = \frac{Runoff_x}{Runoff_a} - 0.5 \times \frac{Runoff_x}{Runoff_a} \times \frac{DTY_y}{DTY_{max}} \quad (S12)$$

where  $E_1$  is the evaluation value of Yellow River runoff;  $Runoff_x$  and  $Runoff_a$  are the runoff in year  $x$  and average runoff from 1980 to 2020, respectively ( $m^3$ ); and  $DTY_y$  and  $DTY_{max}$  are the distance of position  $y$  and maximum distance to the Yellow River, respectively (km). The distance data were obtained through the Euclidean Distance tool in ArcGIS 10.2.

#### S2.5 Index of Connectivity

The hydrological connectivity of the basin, such as the internal relationship between the upstream sediment yield source area and the downstream river channel, is an important method to study the redistribution of runoff and sediment in the basin under topographic changes [26,27]. The application of hydrological connectivity on the basin scale is helpful to understand the potential possibility of the basin inner diameter flow and sediment transport process better, and also helps to explain the difficulty of the basin inner diameter flow and sediment transport from one location to another. Borselli et al. proposed a topographic index algorithm based on the digital elevation model (DEM) and LULC to calculate the hydrological connectivity of a watershed, which revealed the potential for the transport of eroded sediment from the slope-producing source area to the downstream sedimentation area at the watershed scale, and was simple to calculate, required fewer data for implementation, and whose results were complementary to the field runoff plot test values [28]. The index of connectivity (IC) takes into account the characteristics of the upstream part of the catchment nodes in the study basin and the path length of eroded sediment transport to the nearest sedimentation point downstream. The easier the runoff or sediment transport between different areas, the greater the connectivity between them. Therefore, IC can be used to quantitatively describe the hydrological connectivity among nodes at the watershed scale.

The IC was calculated as follows.

$$IC = \ln \left( \frac{\bar{w}\bar{s}\sqrt{A}}{\sum \frac{d_i}{w_i s_i}} \right) \quad (S13)$$

where  $IC$  represents the IC of the grid cell; and  $W$  is the average weight factor (dimensionless) of the upstream area, which represents the impedance encountered in the process of runoff or erosion sediment transport, and affects the efficiency of runoff sediment transport to the river and downstream sedimentation area, and is related to the vegetation cover and LULC changes in the study area. Therefore, the vegetation coverage factor  $C$  in the RUSLE model is used as the weight factor in this study. In addition,  $S$  is the average slope of the upstream catchment (m/m);  $A$  is the area of the upstream catchment ( $m^2$ );  $d_i$  is the distance of the  $i$ th grid cell along the runoff path to the sediment deposition point downstream (m);  $w_i$  is the weight factor of the  $i$ th grid cell (dimensionless); and  $s_i$  is the slope factor of the  $i$ th grid cell (m/m).

In order to avoid extreme or erroneous values, the above equation was used to calculate the connectivity index, with  $s_i=0.005$  as the threshold value when the topographic slope was less than 0.005, and the upper slope was  $s_i=1$ . Borselli et al. defined the range

of the connectivity index as  $(-\infty, +\infty)$ , i.e., when the connectivity index tends to  $+\infty$  at a point in the watershed, the greater the hydrological connectivity at that point, which indicates the greater the probability that runoff sediment will be transported to the channel or downstream sedimentation zone [28].

## References

1. Zhang, L.; Yu, X.; Jiang, M.; Xue, Z.; Lu, X.; Zou, Y. A Consistent Ecosystem Services Valuation Method Based On Total Economic Value and Equivalent Value Factors: A Case Study in the Sanjiang Plain, Northeast China. *Ecol. Complex.* **2017**, *29*, 40–48.
2. Suo, A.; Yu, Y.; Han, F. Evaluation of Ecological Service Value Function of Coastal Zone Around Bohai Sea. *Mar. Dev. Manag.* **2011**, *28*, 67–73. (in Chinese)
3. Xie, G.D.; Zhen, L.; Lu, C.X.; Xiao, Y.; Chen, C. Expert Knowledge Based Valuation Method of Ecosystem Services in China. *J. Nat. Resour.* **2008**, *23*, 911–919.
4. Thomas, A. Development and Properties of 0.25-Degree Gridded Evapotranspiration Data Fields of China for Hydrological Studies. *J. Hydrol.* **2008**, *358*, 145–158.
5. Gao, G.; Chen, D.L.; Ren, G.Y.; Chen, Y.; Liao, Y.M. Trends in Potential Evapotranspiration in China From 1956 to 2000. *Geogr. Stud.* **2006**, 378–387. (in Chinese)
6. Yu, X.X.; Lu, S.W.; Jin, F.; Chen, L.H.; Rao, L.Y. Valuation of Forest Ecosystem Service Functions in China. *J. Ecol.* **2005**, 2096–2102. (in Chinese)
7. Duarte, G.T.; Ribeiro, M.C.; Paglia, A.P. Ecosystem Services Modeling as a Tool for Defining Priority Areas for Conservation. *PLoS ONE* **2016**, *11*, e154573.
8. Chadli, K. Estimation of Soil Loss Using RUSLE Model for Sebou Watershed (Morocco). *Model. Earth Syst. Environ.* **2016**, *2*, 2.
9. Huang, J.; Hong, H.; Zhang, L.; Du, P. Prediction of Soil Erosion in Jiulong River Basin Based On GIS and USLE. *J. Soil Water Conserv.* **2004**, *5*, 75–79. (in Chinese)
10. Helmi, A.M. Quantifying Catchments Sediment Release in Arid Regions Using GIS-based Universal Soil Loss Equation (USLE). *Ain Shams Eng. J.* **2022**, 102038.
11. Zhang, T. *Study On Spatiotemporal Dynamics and Driving Mechanism of Ecosystem Services in the Yellow River Delta*; Shandong University: Jinan, China, 2022.
12. Yue, T.; Yin, S.; Xie, Y.; Yu, B.; Liu, B. Rainfall Erosivity Mapping Over Mainland China Based On High-Density Hourly Rainfall Records. *Earth Syst. Sci. Data* **2022**, *14*, 665–682.
13. USDA-ARS. *Science Documentation: Revised Universal Soil Loss Equation Version 2 (RUSLE2)*; USDA-Agricultural Research Service: Washington, DC, USA, 2013.
14. Williams, J.; Renard, K.; Dyke, P. EPIC, Method for Assessing Erosion's Effects On Soil Productivity. *J. Soil Water Conserv.* **1983**, *38*, 381–383.
15. Zang, S.; Liang, X.; Zhang, S. GIS-based Analysis of Ecological Risk on Land-Use in Daqing City. *J. Nat. Disasters* **2005**, *4*, 141–145.
16. Xie, H.L. Spatial Characteristic Analysis of Land Use Eco-Risk Based On Landscape Structure: A Case Study in the Xingguo County, Jiangxi Province. *China Environ. Sci.* **2011**, *31*, 688–695. (in Chinese with English abstract)
17. Shi, H.; Yin, L.; Gao, M. Landscape Changes and their Ecological Effects of Miaodao Archipelago with Human Disturbances and Under Natural Conditions in the Past 30 Years. *J. Oceanol. Limnol.* **2021**, *39*, 955–978.
18. Yue, T.; Liu, J.; Jørgensen, S.E.; Ye, Q. Landscape Change Detection of the Newly Created Wetland in Yellow River Delta. *Ecol. Model.* **2003**, *164*, 21–31.
19. Zhang, T.; Zeng, S.; Gao, Y.; Ouyang, Z.; Li, B.; Fang, C.; Zhao, B. Assessing Impact of Land Uses On Land Salinization in the Yellow River Delta, China Using an Integrated and Spatial Statistical Model. *Land Use Policy* **2011**, *28*, 857–866.
20. Yu, J.; Li, Y.; Han, G.; Zhou, D.; Fu, Y.; Guan, B.; Wang, G.; Ning, K.; Wu, H.; Wang, J. The Spatial Distribution Characteristics of Soil Salinity in Coastal Zone of the Yellow River Delta. *Environ. Earth Sci.* **2014**, *72*, 589–599.
21. Gao, Y.; Wang, J.; Guo, S.; Hu, Y.; Li, T.; Mao, R.; Zeng, D. Effects of Salinization and Crude Oil Contamination On Soil Bacterial Community Structure in the Yellow River Delta Region, China. *Appl. Soil Ecol.* **2015**, *86*, 165–173.
22. Feng, J.; Ding, J.; Yang, A.; Cai, L. Remote Sensing Modeling of Soil Salinity Information in Arid Areas. *Agric. Res. Arid. Reg.* **2018**, *36*, 266–273. (in Chinese)
23. Wang, J. *Characterization of Soil Salinization Changes in the Yellow River Delta Based On High-Resolution Remote Sensing*; Jinan University: Guangzhou, China, 2020.
24. Cui, B.; Li, X. Coastline Change of the Yellow River Estuary and its Response to the Sediment and Runoff (1976–2005). *Geomorphology* **2011**, *127*, 32–40.
25. Yu, J.; Fu, Y.; Li, Y.; Han, G.; Wang, Y.; Zhou, D.; Sun, W.; Gao, Y.; Meixner, F. Effects of Water Discharge and Sediment Load On Evolution of Modern Yellow River Delta, China, Over the Period From 1976 to 2009. *Biogeosciences Discuss.* **2011**, *8*, 2427–2435.
26. Haregeweyn, N.; Poesen, J.; Verstraeten, G.; Govers, G.; de Vente, J.; Nyssen, J.; Deckers, J.; Moeyersons, J. Assessing the Performance of a Spatially Distributed Soil Erosion and Sediment Delivery Model (Watem/Sedimentation) in Northern Ethiopia. *Land Degrad. Dev.* **2013**, *24*, 188–204.
27. Bracken, L.; Wainwright, J.; Ali, G.; Tetzlaff, D.; Smith, M.; Reaney, S.; Roy, A.G. Concepts of Hydrological Connectivity: Research Approaches, Pathways and Future Agendas. *Earth-Sci. Rev.* **2013**, *119*, 17–34.



28. Borselli, L.; Cassi, P.; Torri, D. Prolegomena to Sediment and Flow Connectivity in the Landscape: A GIS and Field Numerical Assessment. *Catena* **2008**, *75*, 268–277.
